# Supplementary material for: The first 4,4′-imidazolium-tagged C2-symmetric bis(oxazolines): application in the asymmetric Henry reaction
Source: Royal Society of Chemistry journal article supplement (doi:10.1039/c4ra14028a), 2014-12-11
Supplement: c4ra14028a1.pdf [file c4ra14028a1.pdf]

# The First 4, 4'-imidazolium-tagged $C_2$ -symmetric bis(oxazolines): Application in the Asymmetric Henry reaction

Li-Wei Tang,<sup>a</sup> Xiao Dong,<sup>\*a</sup> Zhi-Ming Zhou,<sup>\*a, b</sup> Ying-Qiang Liu<sup>a</sup>, Li Dai<sup>a</sup> and Man Zhang<sup>a</sup>

<sup>a</sup>R&D Center for Pharmaceuticals, School of Chemical Engineering and the Environment, Beijing Institute of Technology, Beijing, PR China. 100081; Fax: +86 010 68912664; Tel: +86 010 68912664; E-mail: zzm@bit.edu.cn

<sup>b</sup>State Key Laboratory of Explosion Science and Technology, Beijing Institute of Technology, Beijing PR China. 100081.

## Supplementary data

### 1. Theoretical calculations results of 9a-Cu-CH<sub>2</sub>NO<sub>2</sub>

Standard orientation:

| Center Number | Atomic Number | Atomic Type | Coordinates (Angstroms) |           |           |
|---------------|---------------|-------------|-------------------------|-----------|-----------|
|               |               |             | X                       | Y         | Z         |
| 1             | 6             | 0           | -0.471409               | 2.009239  | -3.149307 |
| 2             | 6             | 0           | -0.124228               | 1.855218  | -1.640136 |
| 3             | 6             | 0           | -0.037389               | 3.259550  | -0.976913 |
| 4             | 6             | 0           | -1.263082               | 1.090499  | -0.988749 |
| 5             | 7             | 0           | -1.273815               | -0.070111 | -0.427355 |
| 6             | 6             | 0           | -2.672769               | -0.370579 | -0.034904 |
| 7             | 1             | 0           | -2.676659               | -0.664012 | 1.014919  |
| 8             | 6             | 0           | -3.411392               | 0.970004  | -0.248981 |
| 9             | 1             | 0           | -4.314813               | 0.897145  | -0.858642 |
| 10            | 8             | 0           | -2.424875               | 1.738971  | -1.047523 |
| 11            | 6             | 0           | -3.705898               | 1.733251  | 1.026922  |
| 12            | 6             | 0           | -3.153674               | -1.572583 | -0.875789 |
| 13            | 7             | 0           | -4.332795               | -2.230507 | -0.299462 |
| 14            | 6             | 0           | -5.535980               | -2.380170 | -0.891436 |
| 15            | 7             | 0           | -6.324131               | -3.046770 | -0.030206 |
| 16            | 6             | 0           | -5.614275               | -3.302317 | 1.128154  |
| 17            | 6             | 0           | -4.362615               | -2.803941 | 0.962550  |
| 18            | 6             | 0           | -7.749608               | -3.334745 | -0.222842 |
| 19            | 6             | 0           | -5.900898               | -1.949560 | -2.268271 |
| 20            | 29            | 0           | 0.209995                | -1.336262 | -0.094203 |
| 21            | 7             | 0           | 1.588478                | 0.139163  | -0.901204 |
| 22            | 6             | 0           | 1.242032                | 1.204755  | -1.524811 |
| 23            | 8             | 0           | 2.199111                | 1.892603  | -2.168749 |

|    |   |   |           |           |           |
|----|---|---|-----------|-----------|-----------|
| 24 | 6 | 0 | 3.474028  | 1.197102  | -1.943679 |
| 25 | 1 | 0 | 4.108069  | 1.881648  | -1.374452 |
| 26 | 6 | 0 | 3.046710  | -0.029950 | -1.085235 |
| 27 | 1 | 0 | 3.215348  | -0.964749 | -1.630546 |
| 28 | 6 | 0 | 3.820759  | -0.065642 | 0.242446  |
| 29 | 7 | 0 | 3.953101  | -1.392850 | 0.865870  |
| 30 | 6 | 0 | 4.836785  | -2.340875 | 0.501359  |
| 31 | 7 | 0 | 4.775665  | -3.319739 | 1.424731  |
| 32 | 6 | 0 | 3.838635  | -2.983708 | 2.388437  |
| 33 | 6 | 0 | 3.325220  | -1.778044 | 2.036827  |
| 34 | 6 | 0 | 5.614102  | -4.514337 | 1.424691  |
| 35 | 6 | 0 | 5.704717  | -2.379686 | -0.701288 |
| 36 | 6 | 0 | 4.129802  | 0.878502  | -3.271886 |
| 37 | 8 | 0 | 0.350255  | -1.103146 | 1.848530  |
| 38 | 6 | 0 | -0.561487 | -1.802438 | 2.439913  |
| 39 | 6 | 0 | -0.518779 | -1.777429 | 3.959923  |
| 40 | 8 | 0 | -1.430463 | -2.461092 | 1.838825  |
| 41 | 8 | 0 | 1.402960  | -2.946875 | -0.261997 |
| 42 | 7 | 0 | 0.798127  | -3.334586 | -1.365777 |
| 43 | 8 | 0 | -0.155619 | -2.510007 | -1.733842 |
| 44 | 6 | 0 | 1.111905  | -4.411664 | -2.018076 |
| 45 | 1 | 0 | 1.901624  | -5.029513 | -1.621869 |
| 46 | 1 | 0 | 0.557792  | -4.635908 | -2.915429 |
| 47 | 1 | 0 | -1.435480 | 2.508931  | -3.254879 |
| 48 | 1 | 0 | 0.299181  | 2.603248  | -3.642255 |
| 49 | 1 | 0 | -0.525841 | 1.032643  | -3.639343 |
| 50 | 1 | 0 | 0.189265  | 3.174266  | 0.089977  |
| 51 | 1 | 0 | 0.752052  | 3.840700  | -1.455561 |
| 52 | 1 | 0 | -0.988908 | 3.780223  | -1.089760 |
| 53 | 1 | 0 | -4.046408 | 2.744234  | 0.789467  |
| 54 | 1 | 0 | -4.518401 | 1.219395  | 1.547579  |
| 55 | 1 | 0 | -2.822979 | 1.795017  | 1.673106  |
| 56 | 1 | 0 | -2.344570 | -2.303111 | -0.932242 |
| 57 | 1 | 0 | -3.402415 | -1.257431 | -1.890164 |
| 58 | 1 | 0 | -6.064041 | -3.809936 | 1.965036  |
| 59 | 1 | 0 | -3.484741 | -2.812916 | 1.595156  |
| 60 | 1 | 0 | -8.277422 | -2.386257 | -0.368705 |
| 61 | 1 | 0 | -7.885427 | -3.998407 | -1.079988 |
| 62 | 1 | 0 | -8.110465 | -3.837802 | 0.673958  |
| 63 | 1 | 0 | -6.948909 | -2.170305 | -2.462674 |
| 64 | 1 | 0 | -5.796923 | -0.863411 | -2.364722 |
| 65 | 1 | 0 | -5.278311 | -2.460078 | -3.011168 |
| 66 | 1 | 0 | 4.835290  | 0.308967  | 0.082166  |
| 67 | 1 | 0 | 3.326017  | 0.573371  | 0.975764  |

---

|     |    |   |            |           |           |
|-----|----|---|------------|-----------|-----------|
| 68  | 1  | 0 | 3.618967   | -3.632723 | 3.219661  |
| 69  | 1  | 0 | 2.518666   | -1.198844 | 2.458000  |
| 70  | 1  | 0 | 6.668256   | -4.233350 | 1.477267  |
| 71  | 1  | 0 | 5.357722   | -5.115392 | 2.296518  |
| 72  | 1  | 0 | 5.439389   | -5.103803 | 0.521630  |
| 73  | 1  | 0 | 5.605751   | -1.466372 | -1.284786 |
| 74  | 1  | 0 | 6.762323   | -2.430217 | -0.424071 |
| 75  | 1  | 0 | 5.446122   | -3.242667 | -1.325956 |
| 76  | 1  | 0 | 3.549855   | 0.140297  | -3.835886 |
| 77  | 1  | 0 | 4.224470   | 1.785670  | -3.874882 |
| 78  | 1  | 0 | 5.136101   | 0.498915  | -3.075637 |
| 79  | 1  | 0 | -0.523597  | -0.744546 | 4.319741  |
| 80  | 1  | 0 | -1.365990  | -2.321143 | 4.378810  |
| 81  | 1  | 0 | 0.411394   | -2.236427 | 4.311000  |
| 82  | 6  | 0 | -8.435575  | 2.090641  | 1.712324  |
| 83  | 6  | 0 | -8.113967  | 2.018436  | 0.357257  |
| 84  | 6  | 0 | -8.479258  | 3.052416  | -0.506361 |
| 85  | 6  | 0 | -9.174254  | 4.152646  | -0.008784 |
| 86  | 6  | 0 | -9.517058  | 4.241504  | 1.347880  |
| 87  | 6  | 0 | -9.131284  | 3.197256  | 2.198321  |
| 88  | 6  | 0 | -10.298434 | 5.423035  | 1.872608  |
| 89  | 16 | 0 | -7.266662  | 0.566907  | -0.291041 |
| 90  | 8  | 0 | -6.493887  | -0.003290 | 0.855472  |
| 91  | 8  | 0 | -8.332050  | -0.352960 | -0.790519 |
| 92  | 8  | 0 | -6.386966  | 1.082230  | -1.390295 |
| 93  | 1  | 0 | -8.121804  | 1.290910  | 2.374430  |
| 94  | 1  | 0 | -8.199323  | 2.995676  | -1.552727 |
| 95  | 1  | 0 | -9.450949  | 4.959844  | -0.683026 |
| 96  | 1  | 0 | -9.374238  | 3.253893  | 3.256863  |
| 97  | 1  | 0 | -11.378670 | 5.265076  | 1.761058  |
| 98  | 1  | 0 | -10.103480 | 5.592837  | 2.935740  |
| 99  | 1  | 0 | -10.049303 | 6.341091  | 1.331415  |
| 100 | 6  | 0 | 8.274992   | 2.470136  | 1.493336  |
| 101 | 6  | 0 | 8.562001   | 1.729171  | 0.348267  |
| 102 | 6  | 0 | 9.632444   | 2.091743  | -0.471483 |
| 103 | 6  | 0 | 10.404590  | 3.203910  | -0.144969 |
| 104 | 6  | 0 | 10.126848  | 3.970697  | 0.996247  |
| 105 | 6  | 0 | 9.056118   | 3.581695  | 1.810674  |
| 106 | 6  | 0 | 10.952602  | 5.191973  | 1.326043  |
| 107 | 16 | 0 | 7.531361   | 0.321424  | -0.102771 |
| 108 | 8  | 0 | 8.448747   | -0.693243 | -0.680948 |
| 109 | 8  | 0 | 6.854802   | -0.113209 | 1.158916  |
| 110 | 8  | 0 | 6.532650   | 0.849749  | -1.100560 |
| 111 | 1  | 0 | 7.458339   | 2.155914  | 2.134138  |

---

|     |   |   |           |          |           |
|-----|---|---|-----------|----------|-----------|
| 112 | 1 | 0 | 9.863960  | 1.488305 | -1.342705 |
| 113 | 1 | 0 | 11.242456 | 3.478556 | -0.781746 |
| 114 | 1 | 0 | 8.834914  | 4.152163 | 2.709887  |
| 115 | 1 | 0 | 10.609019 | 6.068624 | 0.762212  |
| 116 | 1 | 0 | 10.889312 | 5.443358 | 2.388852  |
| 117 | 1 | 0 | 12.007776 | 5.042381 | 1.076014  |

---

## 2. Theoretical calculations results of 9b-Cu-CH<sub>2</sub>NO<sub>2</sub>

Standard orientation:

---

| Center<br>Number | Atomic<br>Number | Atomic<br>Type | Coordinates (Angstroms) |           |           |
|------------------|------------------|----------------|-------------------------|-----------|-----------|
|                  |                  |                | X                       | Y         | Z         |
| 1                | 6                | 0              | -0.067348               | 3.621571  | 1.520185  |
| 2                | 6                | 0              | -0.468414               | 3.269738  | 0.053997  |
| 3                | 6                | 0              | -0.992195               | 4.533323  | -0.667575 |
| 4                | 6                | 0              | 0.772050                | 2.738257  | -0.646227 |
| 5                | 7                | 0              | 1.189319                | 1.531194  | -0.659021 |
| 6                | 6                | 0              | 2.443707                | 1.482091  | -1.427554 |
| 7                | 1                | 0              | 2.255746                | 0.865229  | -2.311956 |
| 8                | 6                | 0              | 2.705405                | 2.967357  | -1.806256 |
| 9                | 1                | 0              | 3.568915                | 3.377497  | -1.270228 |
| 10               | 8                | 0              | 1.533519                | 3.666850  | -1.265042 |
| 11               | 6                | 0              | 2.810757                | 3.252466  | -3.293061 |
| 12               | 6                | 0              | 3.521803                | 0.787926  | -0.581776 |
| 13               | 7                | 0              | 4.618378                | 0.234637  | -1.388104 |
| 14               | 6                | 0              | 5.915992                | 0.583719  | -1.313961 |
| 15               | 7                | 0              | 6.612116                | -0.308014 | -2.041167 |
| 16               | 6                | 0              | 5.737964                | -1.246154 | -2.564915 |
| 17               | 6                | 0              | 4.488137                | -0.911816 | -2.157056 |
| 18               | 6                | 0              | 8.071947                | -0.419372 | -2.071172 |
| 19               | 6                | 0              | 6.469862                | 1.753840  | -0.580400 |
| 20               | 29               | 0              | 0.156370                | -0.169699 | 0.227913  |
| 21               | 7                | 0              | -1.475263               | 0.945763  | 0.084808  |
| 22               | 6                | 0              | -1.578049               | 2.230143  | 0.123998  |
| 23               | 8                | 0              | -2.806660               | 2.721234  | 0.304702  |
| 24               | 6                | 0              | -3.664841               | 1.568553  | 0.688904  |
| 25               | 1                | 0              | -4.628268               | 1.712817  | 0.202550  |
| 26               | 6                | 0              | -2.842779               | 0.385148  | 0.135965  |
| 27               | 1                | 0              | -2.869678               | -0.456799 | 0.830406  |

---

|    |   |   |           |           |           |
|----|---|---|-----------|-----------|-----------|
| 28 | 6 | 0 | -3.186945 | -0.111655 | -1.294664 |
| 29 | 7 | 0 | -3.996178 | -1.334089 | -1.300708 |
| 30 | 6 | 0 | -5.261184 | -1.467740 | -1.741062 |
| 31 | 7 | 0 | -5.636733 | -2.735580 | -1.492154 |
| 32 | 6 | 0 | -4.592984 | -3.406916 | -0.875915 |
| 33 | 6 | 0 | -3.559393 | -2.534531 | -0.763305 |
| 34 | 6 | 0 | -6.974478 | -3.294136 | -1.714857 |
| 35 | 6 | 0 | -6.057253 | -0.421777 | -2.435434 |
| 36 | 6 | 0 | -3.804730 | 1.564728  | 2.199148  |
| 37 | 8 | 0 | -0.487215 | -1.606178 | -0.932479 |
| 38 | 6 | 0 | 0.389575  | -2.008591 | -1.804208 |
| 39 | 6 | 0 | 0.114800  | -3.374355 | -2.415890 |
| 40 | 8 | 0 | 1.399150  | -1.367062 | -2.129970 |
| 41 | 8 | 0 | 1.648314  | -1.176659 | 1.010273  |
| 42 | 7 | 0 | 1.569732  | -0.520235 | 2.165920  |
| 43 | 8 | 0 | 0.515313  | 0.277965  | 2.194702  |
| 44 | 6 | 0 | 2.435183  | -0.645180 | 3.115697  |
| 45 | 1 | 0 | 3.289642  | -1.288623 | 2.958303  |
| 46 | 1 | 0 | 2.269826  | -0.059996 | 4.007797  |
| 47 | 1 | 0 | 0.713276  | 4.387114  | 1.505843  |
| 48 | 1 | 0 | -0.936571 | 4.021629  | 2.048289  |
| 49 | 1 | 0 | 0.300014  | 2.736264  | 2.044803  |
| 50 | 1 | 0 | -1.277020 | 4.317986  | -1.701236 |
| 51 | 1 | 0 | -1.865537 | 4.921228  | -0.143413 |
| 52 | 1 | 0 | -0.213842 | 5.296677  | -0.680018 |
| 53 | 1 | 0 | 1.933808  | 2.868131  | -3.822333 |
| 54 | 1 | 0 | 2.893666  | 4.325552  | -3.484095 |
| 55 | 1 | 0 | 3.698794  | 2.759453  | -3.701914 |
| 56 | 1 | 0 | 3.067656  | -0.054284 | -0.054338 |
| 57 | 1 | 0 | 3.949613  | 1.452266  | 0.168230  |
| 58 | 1 | 0 | 6.088386  | -2.076751 | -3.154605 |
| 59 | 1 | 0 | 3.519958  | -1.372003 | -2.311703 |
| 60 | 1 | 0 | 8.335117  | -1.234795 | -2.744052 |
| 61 | 1 | 0 | 8.518806  | 0.503959  | -2.445215 |
| 62 | 1 | 0 | 8.422694  | -0.637447 | -1.061058 |
| 63 | 1 | 0 | 6.002692  | 2.682771  | -0.922097 |
| 64 | 1 | 0 | 6.298569  | 1.617729  | 0.489326  |
| 65 | 1 | 0 | 7.544675  | 1.829685  | -0.737285 |
| 66 | 1 | 0 | -3.718422 | 0.656405  | -1.857829 |
| 67 | 1 | 0 | -2.247986 | -0.350202 | -1.795306 |
| 68 | 1 | 0 | -4.680940 | -4.438560 | -0.578125 |
| 69 | 1 | 0 | -2.544323 | -2.642919 | -0.409071 |
| 70 | 1 | 0 | -7.690377 | -2.751992 | -1.096732 |
| 71 | 1 | 0 | -7.243247 | -3.218877 | -2.770494 |

---

|    |    |   |           |           |           |
|----|----|---|-----------|-----------|-----------|
| 72 | 1  | 0 | -6.950035 | -4.345991 | -1.432279 |
| 73 | 1  | 0 | -5.498756 | -0.025040 | -3.289103 |
| 74 | 1  | 0 | -6.996738 | -0.836678 | -2.796423 |
| 75 | 1  | 0 | -6.308319 | 0.383077  | -1.740276 |
| 76 | 1  | 0 | -4.500353 | 0.776577  | 2.486406  |
| 77 | 1  | 0 | -2.835954 | 1.401430  | 2.682783  |
| 78 | 1  | 0 | -4.221227 | 2.515450  | 2.539320  |
| 79 | 1  | 0 | -0.955989 | -3.534811 | -2.565190 |
| 80 | 1  | 0 | 0.648519  | -3.483244 | -3.361220 |
| 81 | 1  | 0 | 0.472067  | -4.145707 | -1.724755 |
| 82 | 15 | 0 | 6.439124  | -1.263486 | 1.847928  |
| 83 | 9  | 0 | 7.013531  | -0.644996 | 3.225949  |
| 84 | 9  | 0 | 5.845055  | -1.816617 | 0.419313  |
| 85 | 9  | 0 | 5.278927  | -2.080275 | 2.652479  |
| 86 | 9  | 0 | 7.571292  | -0.398447 | 0.990848  |
| 87 | 9  | 0 | 5.407674  | 0.038896  | 1.711837  |
| 88 | 9  | 0 | 7.448478  | -2.520715 | 1.929382  |
| 89 | 15 | 0 | -7.349364 | 0.030801  | 1.103904  |
| 90 | 9  | 0 | -6.876355 | 1.266535  | 0.092520  |
| 91 | 9  | 0 | -7.745678 | -1.224432 | 2.038676  |
| 92 | 9  | 0 | -8.809515 | 0.692719  | 1.245711  |
| 93 | 9  | 0 | -5.829984 | -0.620861 | 0.881576  |
| 94 | 9  | 0 | -7.851567 | -0.808409 | -0.234335 |
| 95 | 9  | 0 | -6.789466 | 0.866889  | 2.376179  |

---

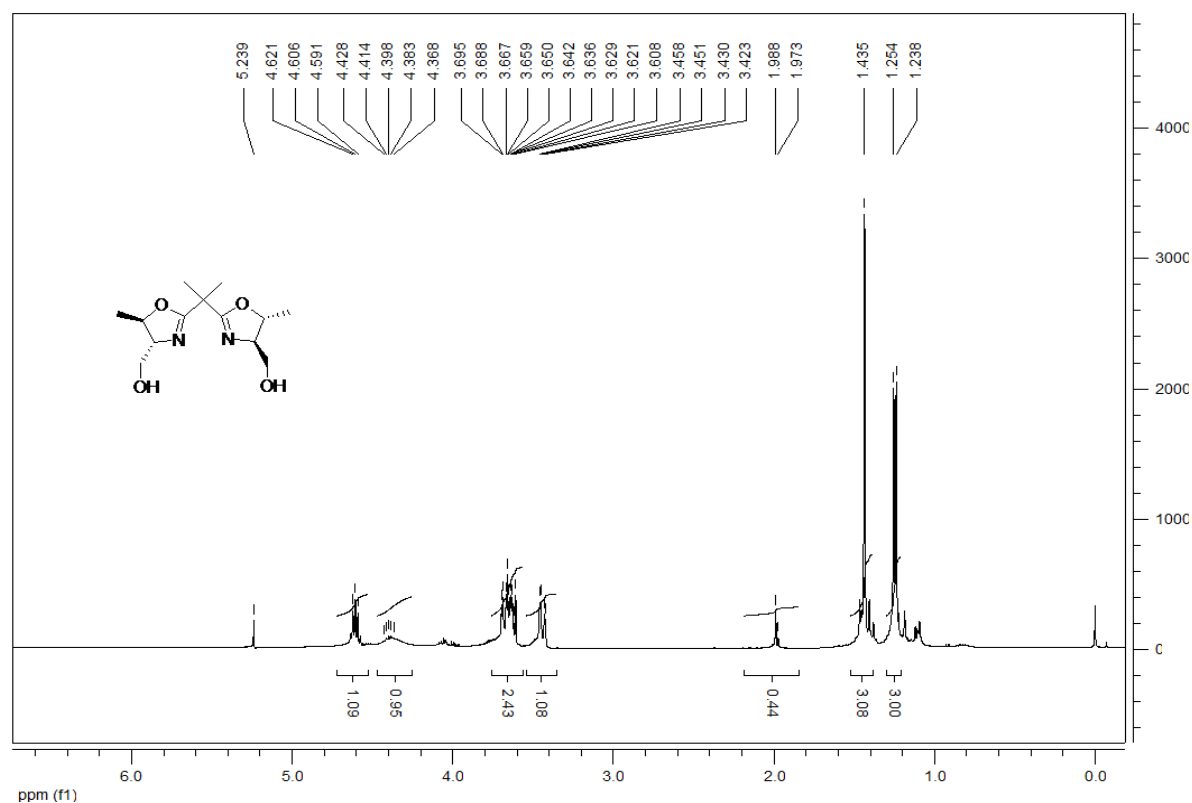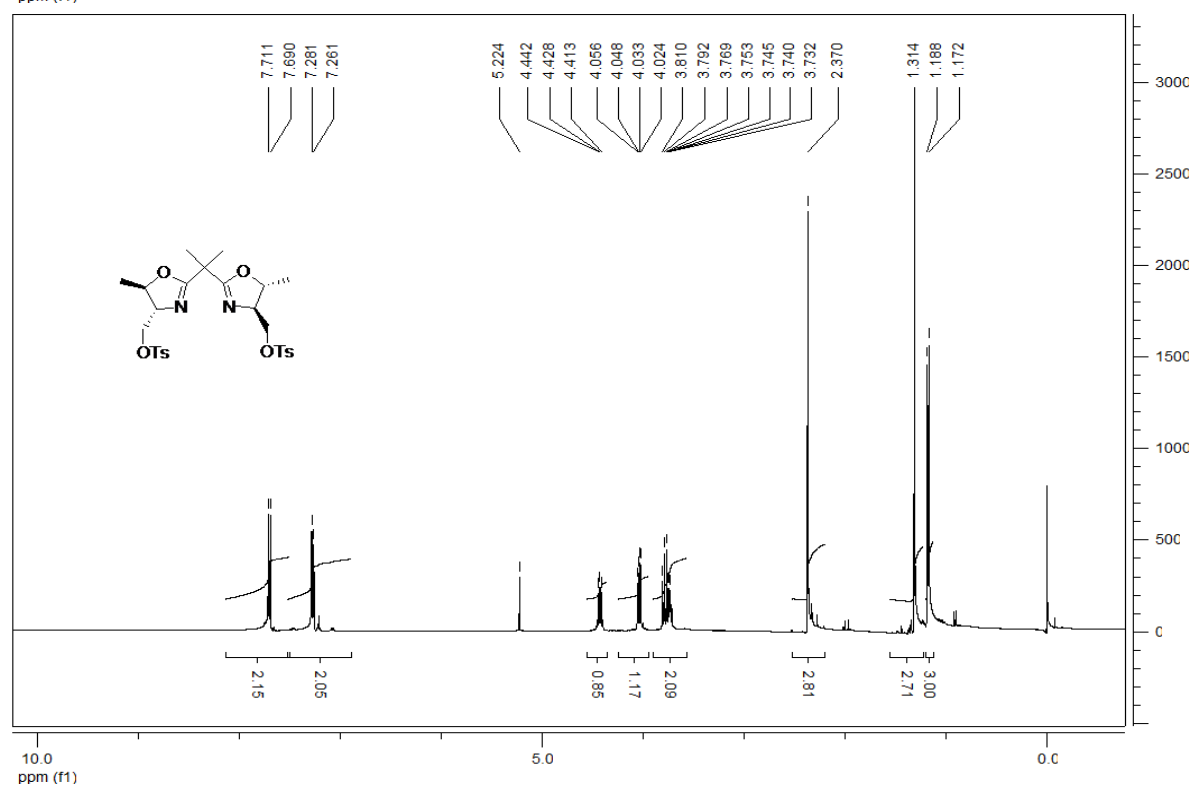

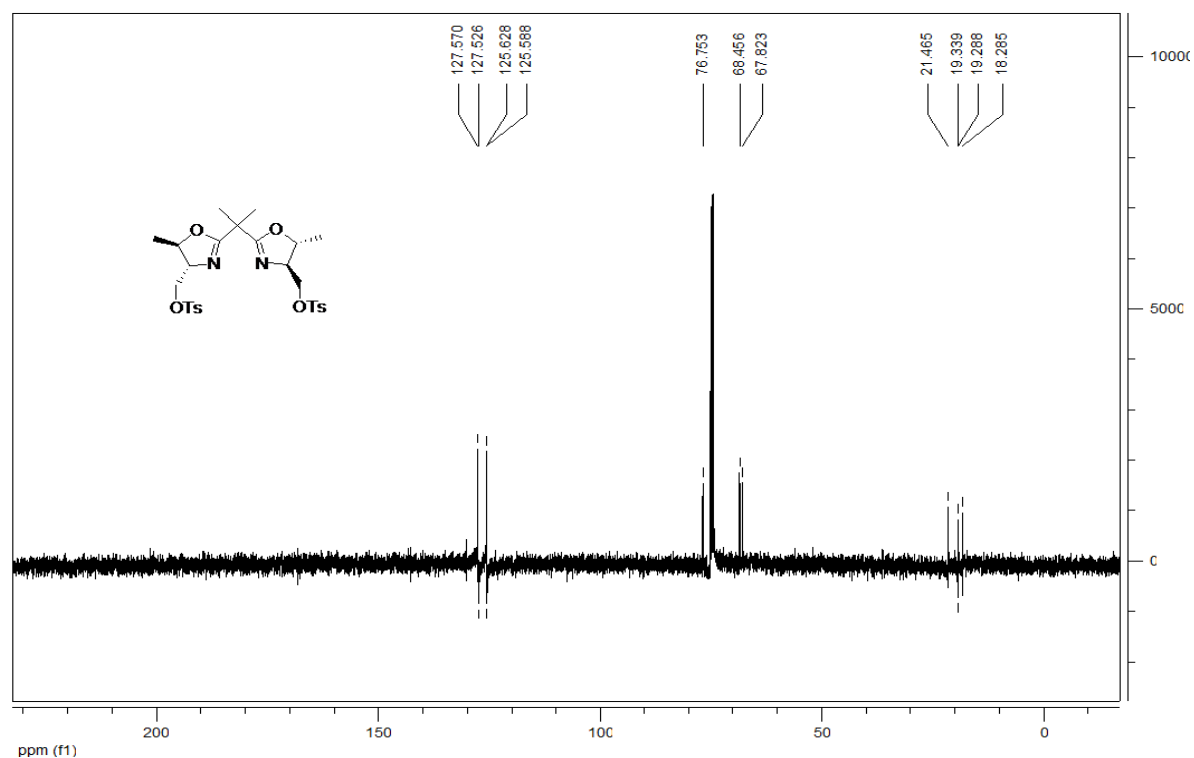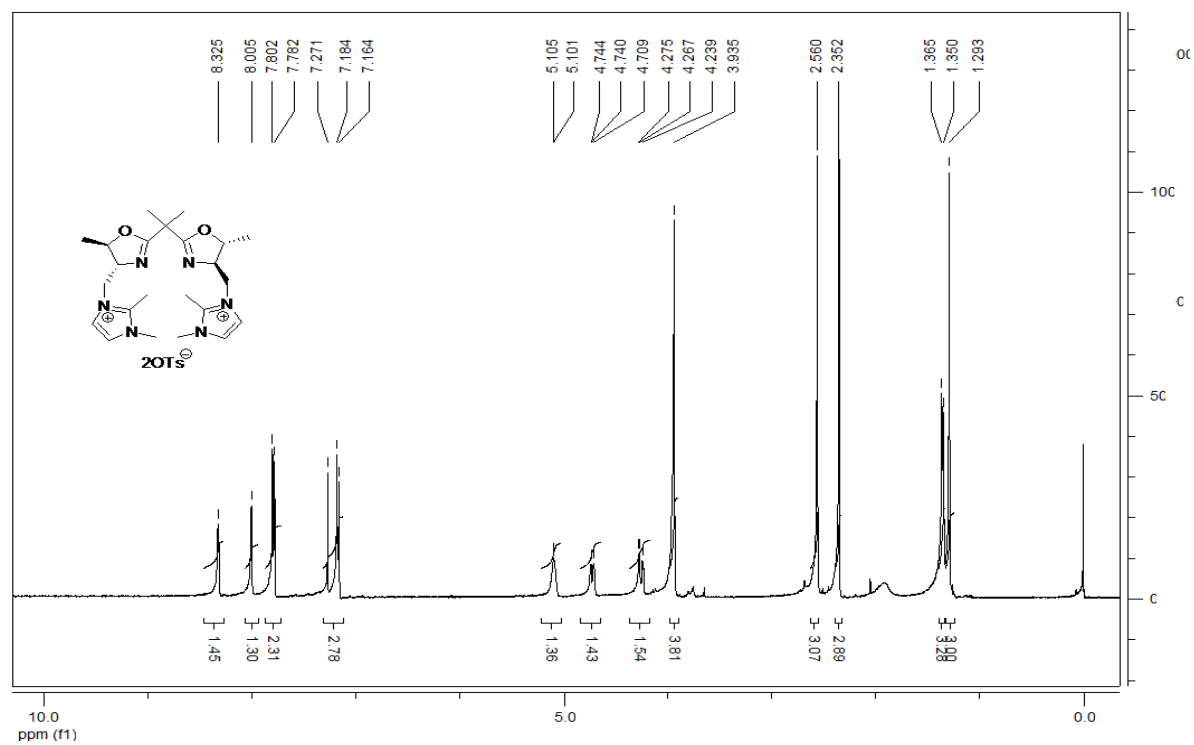



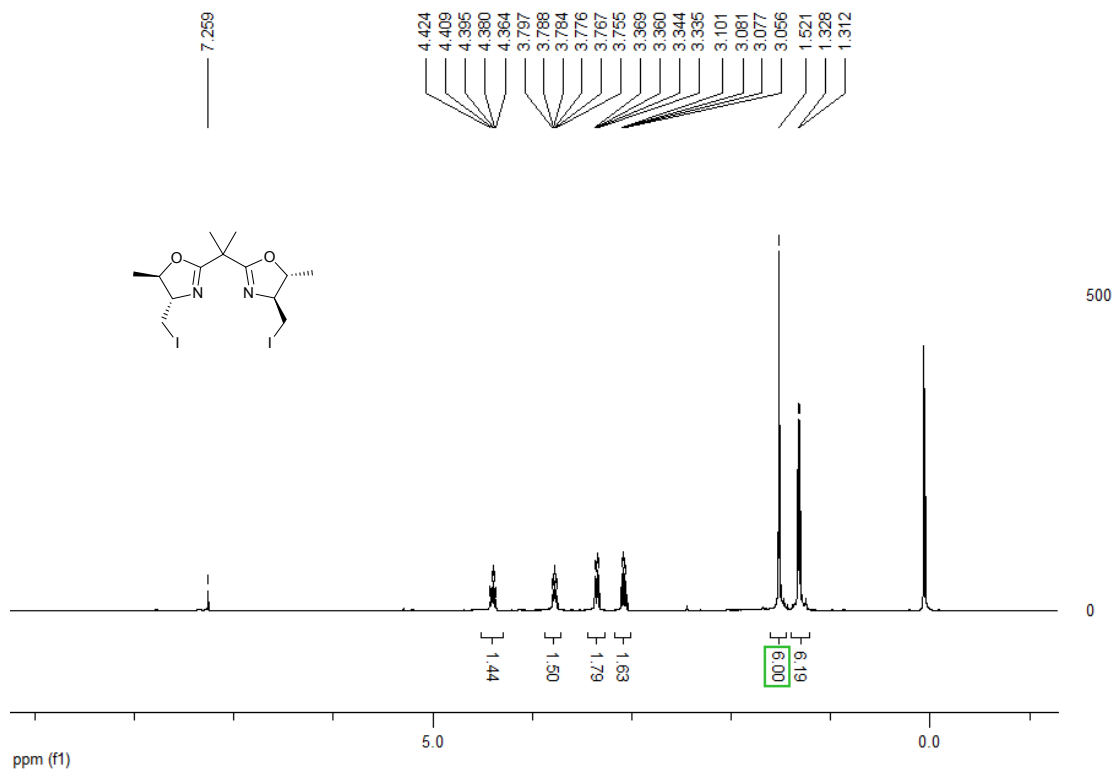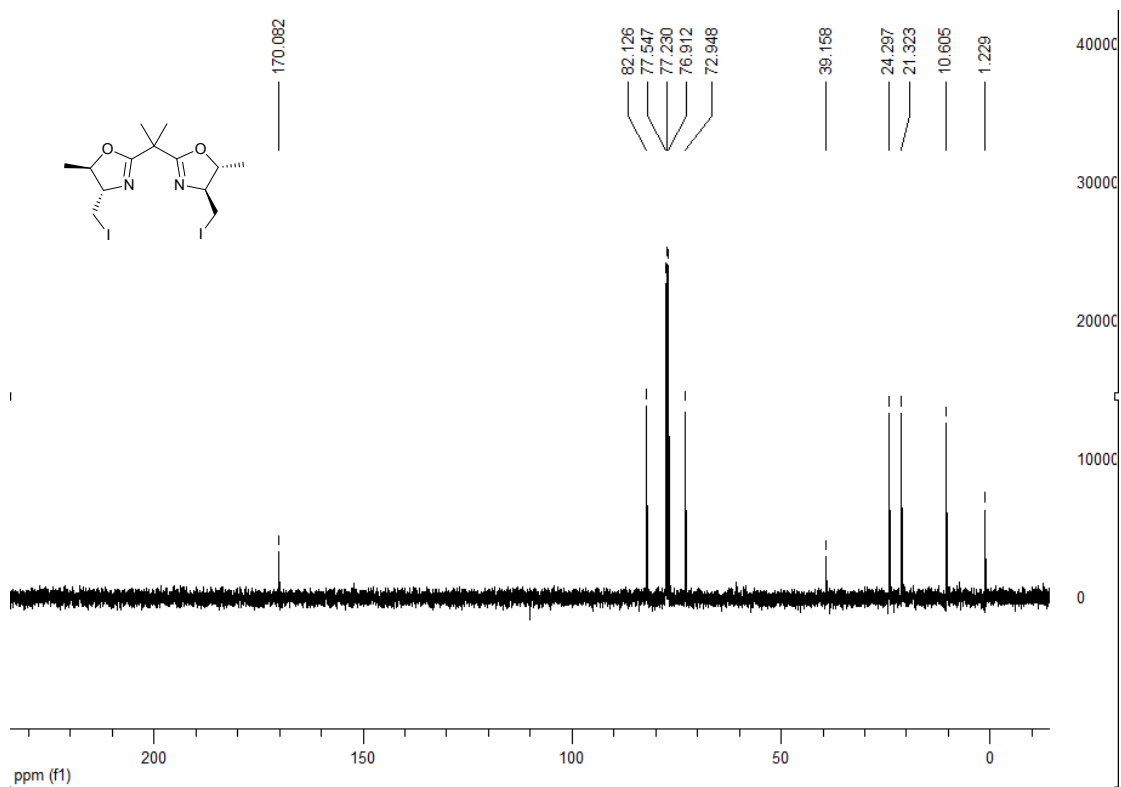

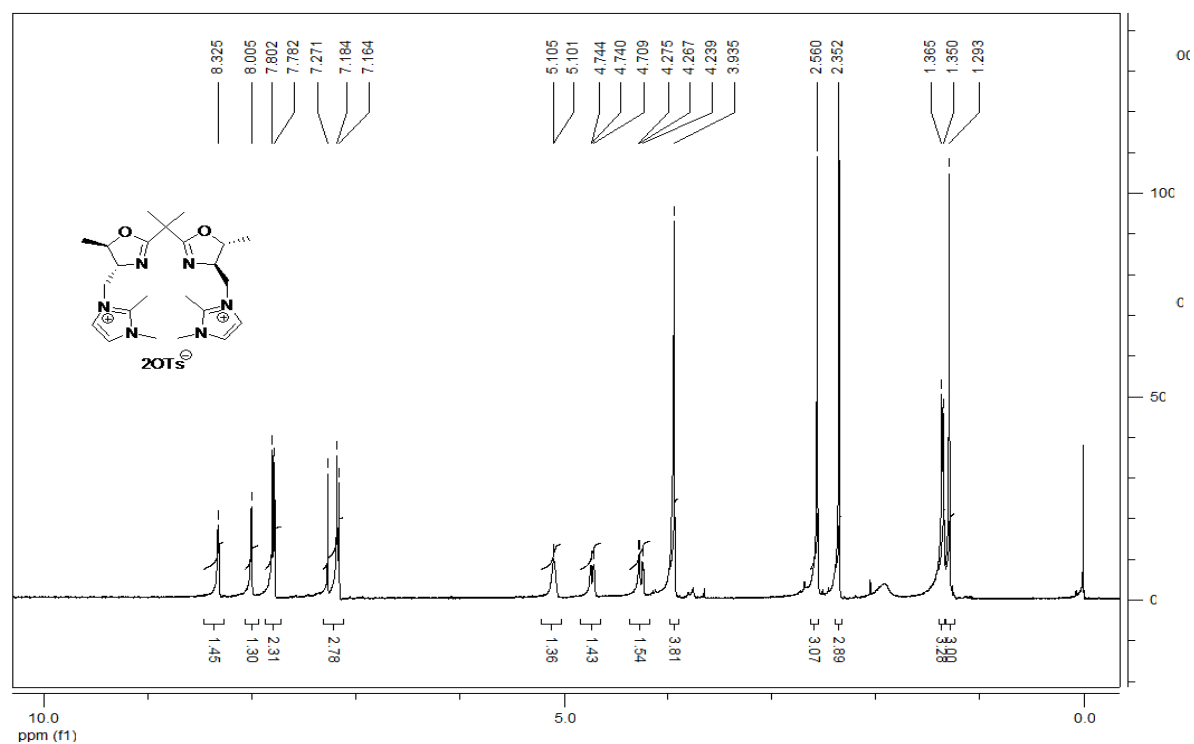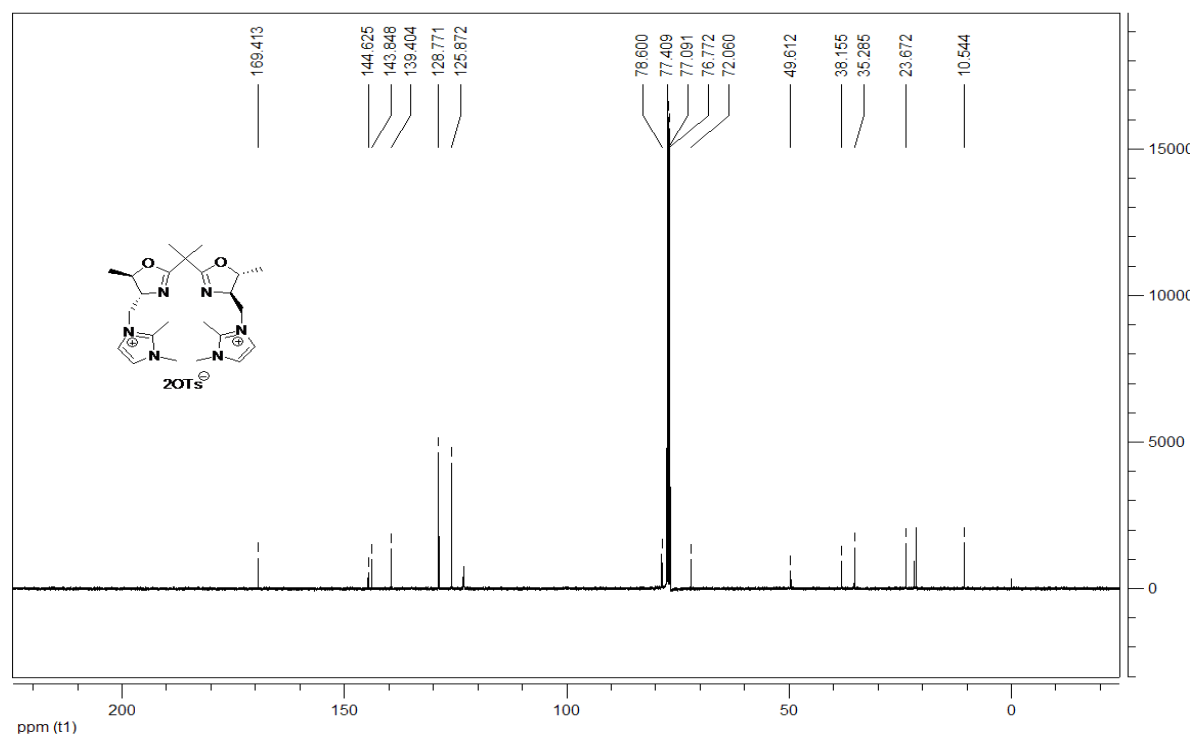

### Peking University Mass Spectrometry Sample Analysis Report

**Analysis Info**

Analysis Name 12100473\_20121019\_000001.d  
 Sample BITLYQ-1  
 Comment ESI Positive

Acquisition Date 10/19/2012 10:07:41 AM  
 Instrument Bruker Apex IV FTMS  
 Operator Peking University

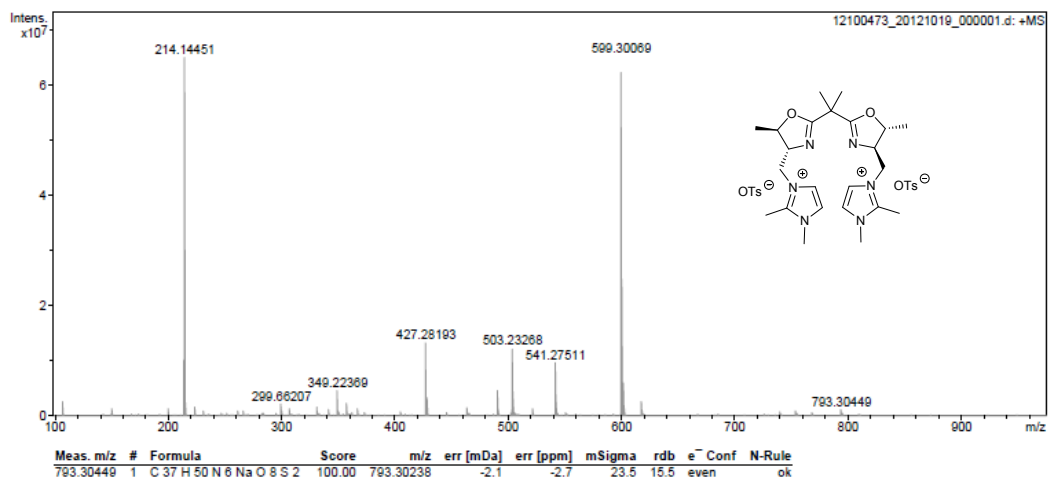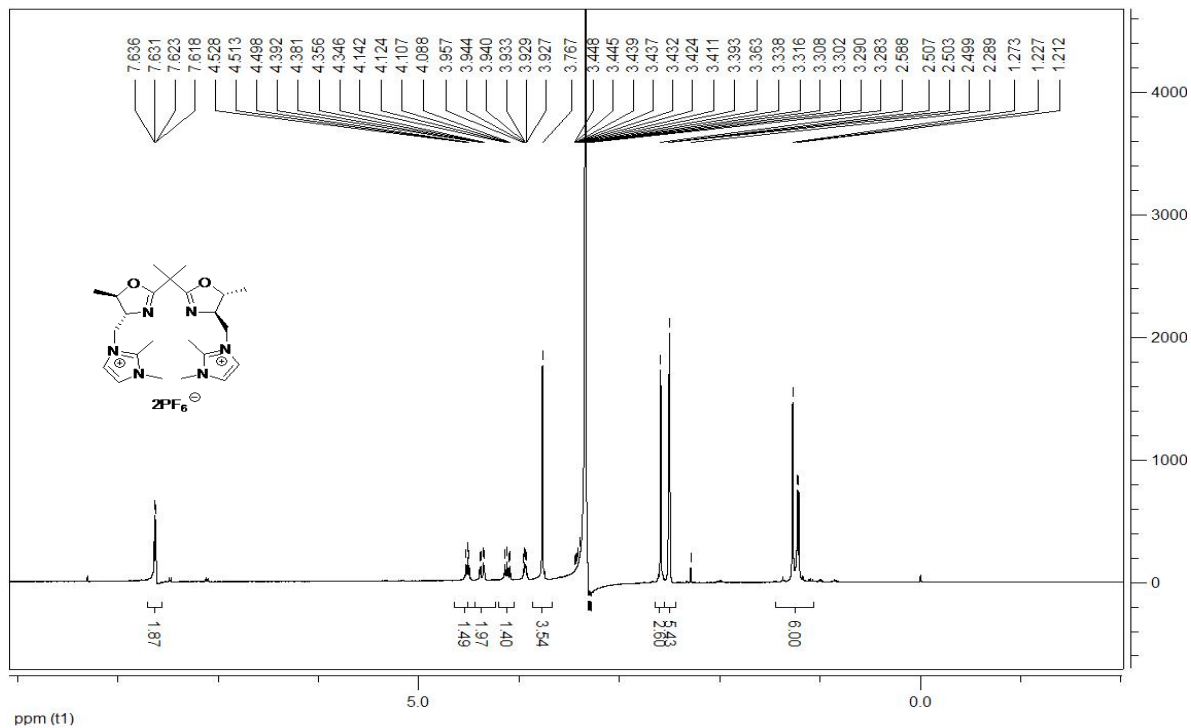

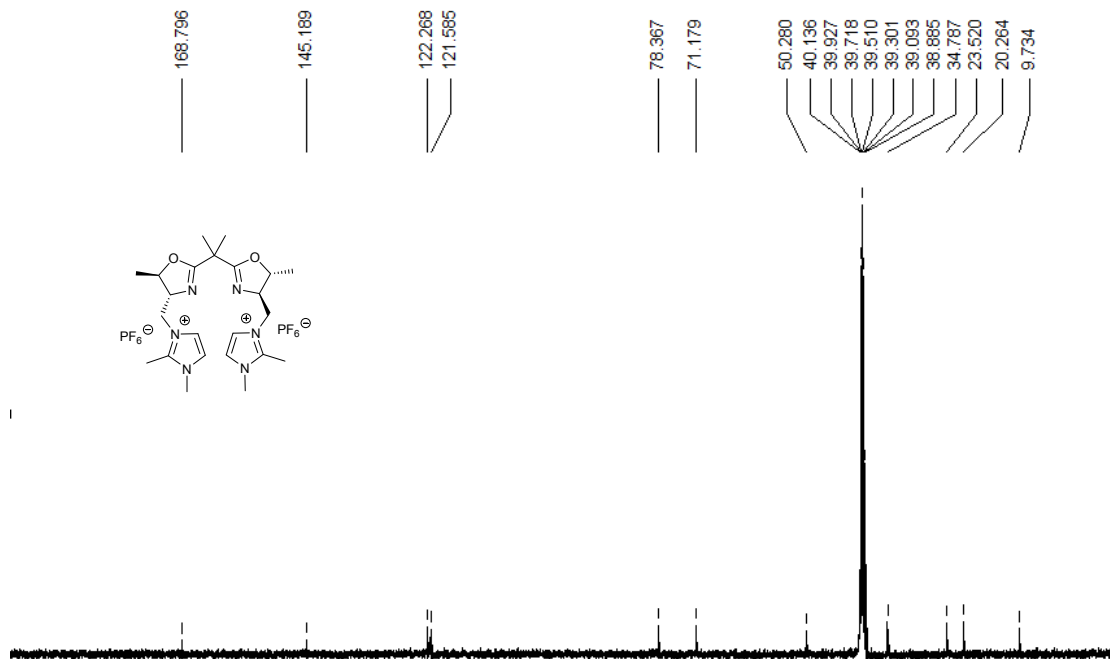

### Peking University Mass Spectrometry Sample Analysis Report

#### Analysis Info

Analysis Name 12100661\_20121024\_000002.d  
 Sample L-PF6  
 Comment ESI Positive

Acquisition Date 10/24/2012 10:49:10 AM  
 Instrument Bruker Apex IV FTMS  
 Operator Peking University

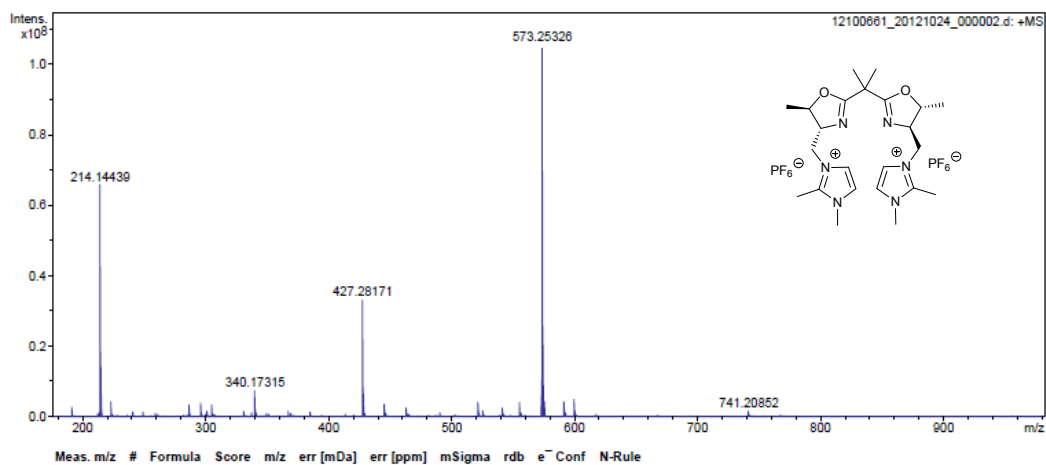

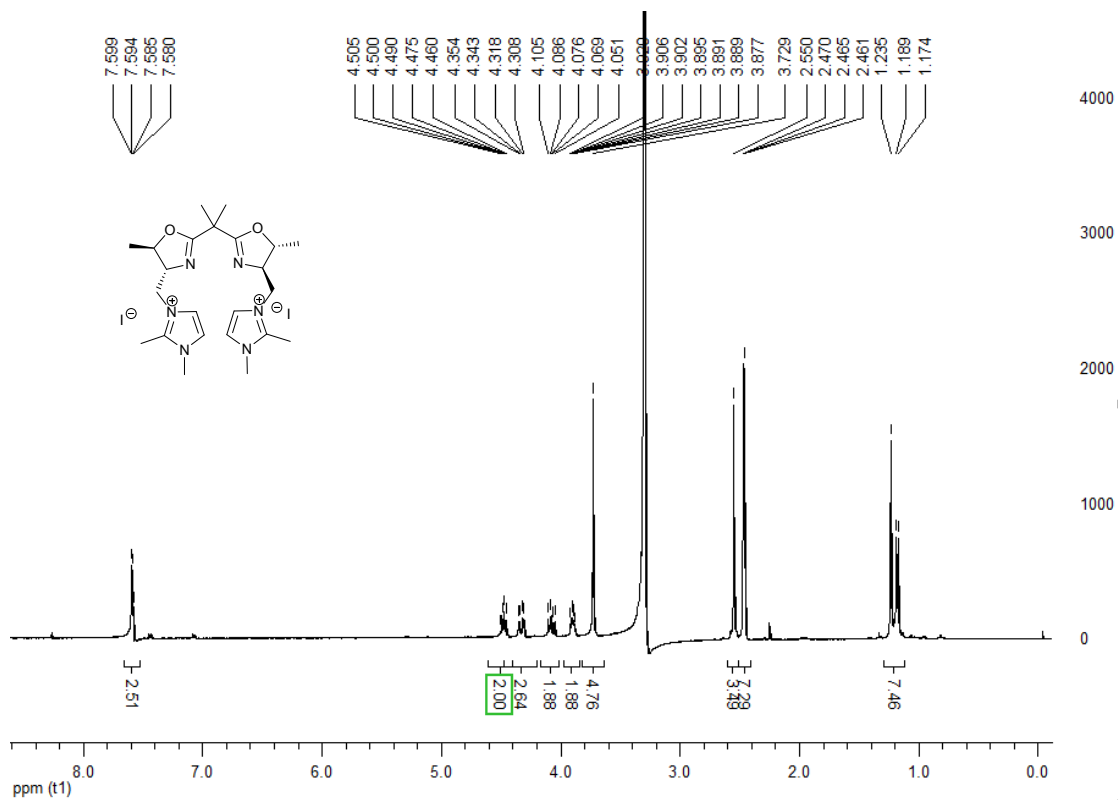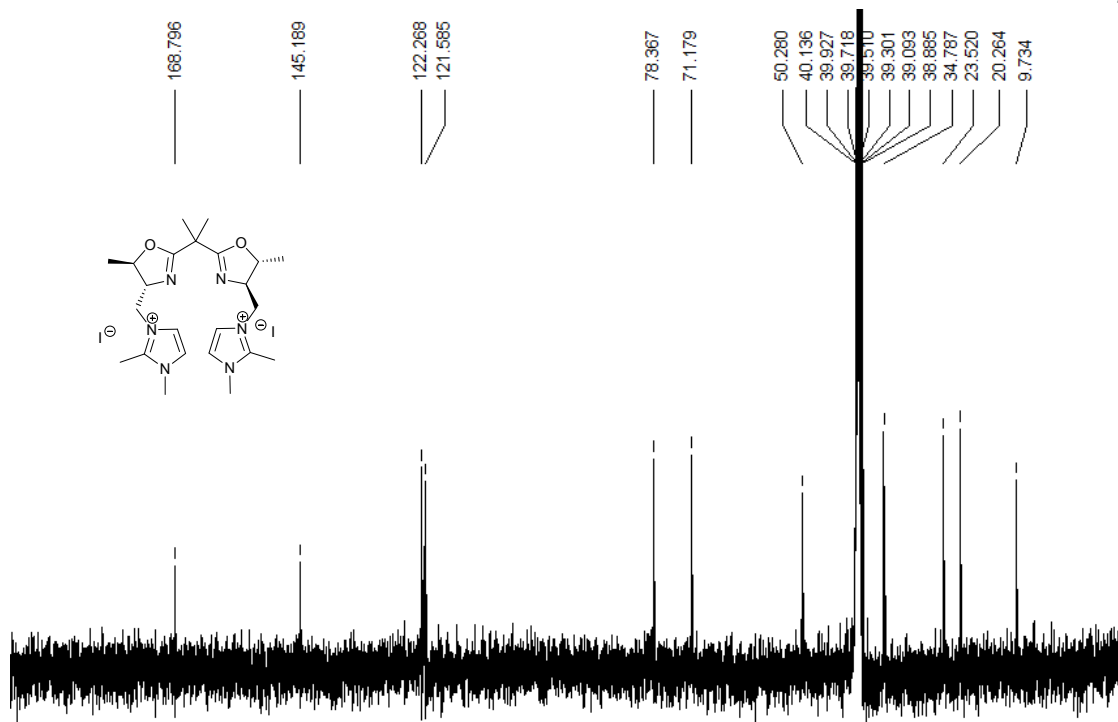

### Peking University Mass Spectrometry Sample Analysis Report

**Analysis Info**

Analysis Name ZHOZHIMING01\_20140604\_000001.d  
 Sample TP-30  
 Comment ESI Positive

Acquisition Date 6/4/2014 12:05:56 PM  
 Instrument Bruker Apex IV FTMS  
 Operator Peking University

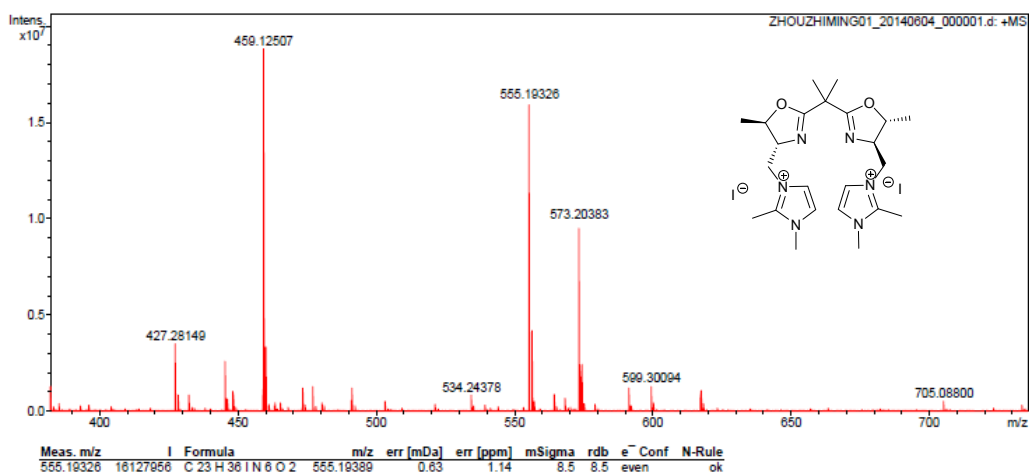

### Ee value of 11k

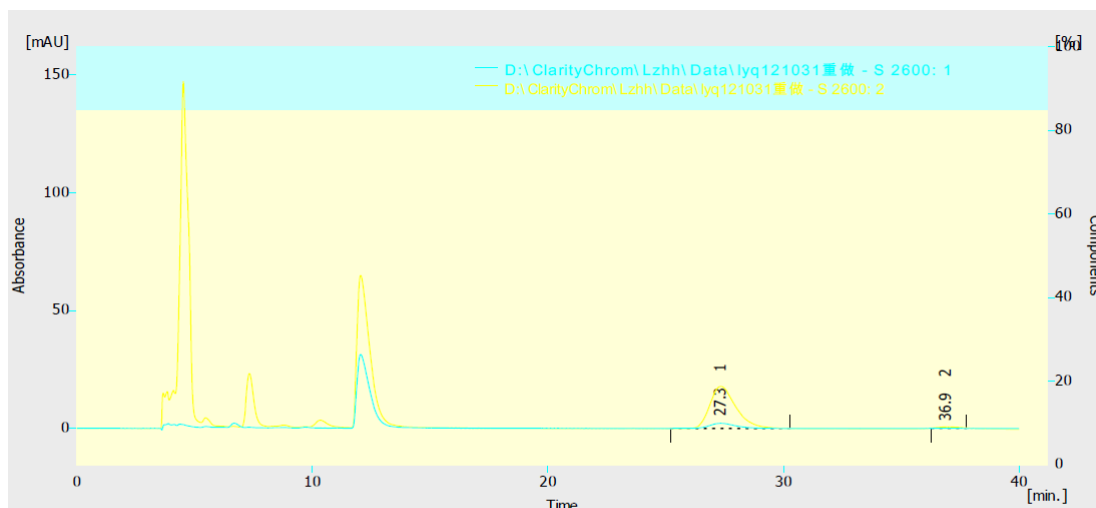

Result Table (Uncal - D:\ClarityChrom\Lzh\h\Data\lyq121031重微 - S 2600: 1)

|   | Reten. Time [min] | Start Time [min] | End Time [min] | Start Value [mAU] | End Value [mAU] | Area [mAU.s] | Height [mAU] | Area [%] | Height [%] | W05 [min] |
|---|-------------------|------------------|----------------|-------------------|-----------------|--------------|--------------|----------|------------|-----------|
| 1 | 27.333            | 25.217           | 30.283         | -0.111            | -0.134          | 185.876      | 2.220        | 97.3     | 95.6       | 1.22      |
| 2 | 36.883            | 36.283           | 37.767         | -0.052            | -0.092          | 5.088        | 0.103        | 2.7      | 4.4        | 0.65      |
|   | Total             | Total            | Total          | Total             | Total           | 190.964      | 2.323        | 100.0    | 100.0      |           |
